# Supplementary material
Source: PubMed Central journal article supplement (PMC6478018)

Supplementary Figure 1

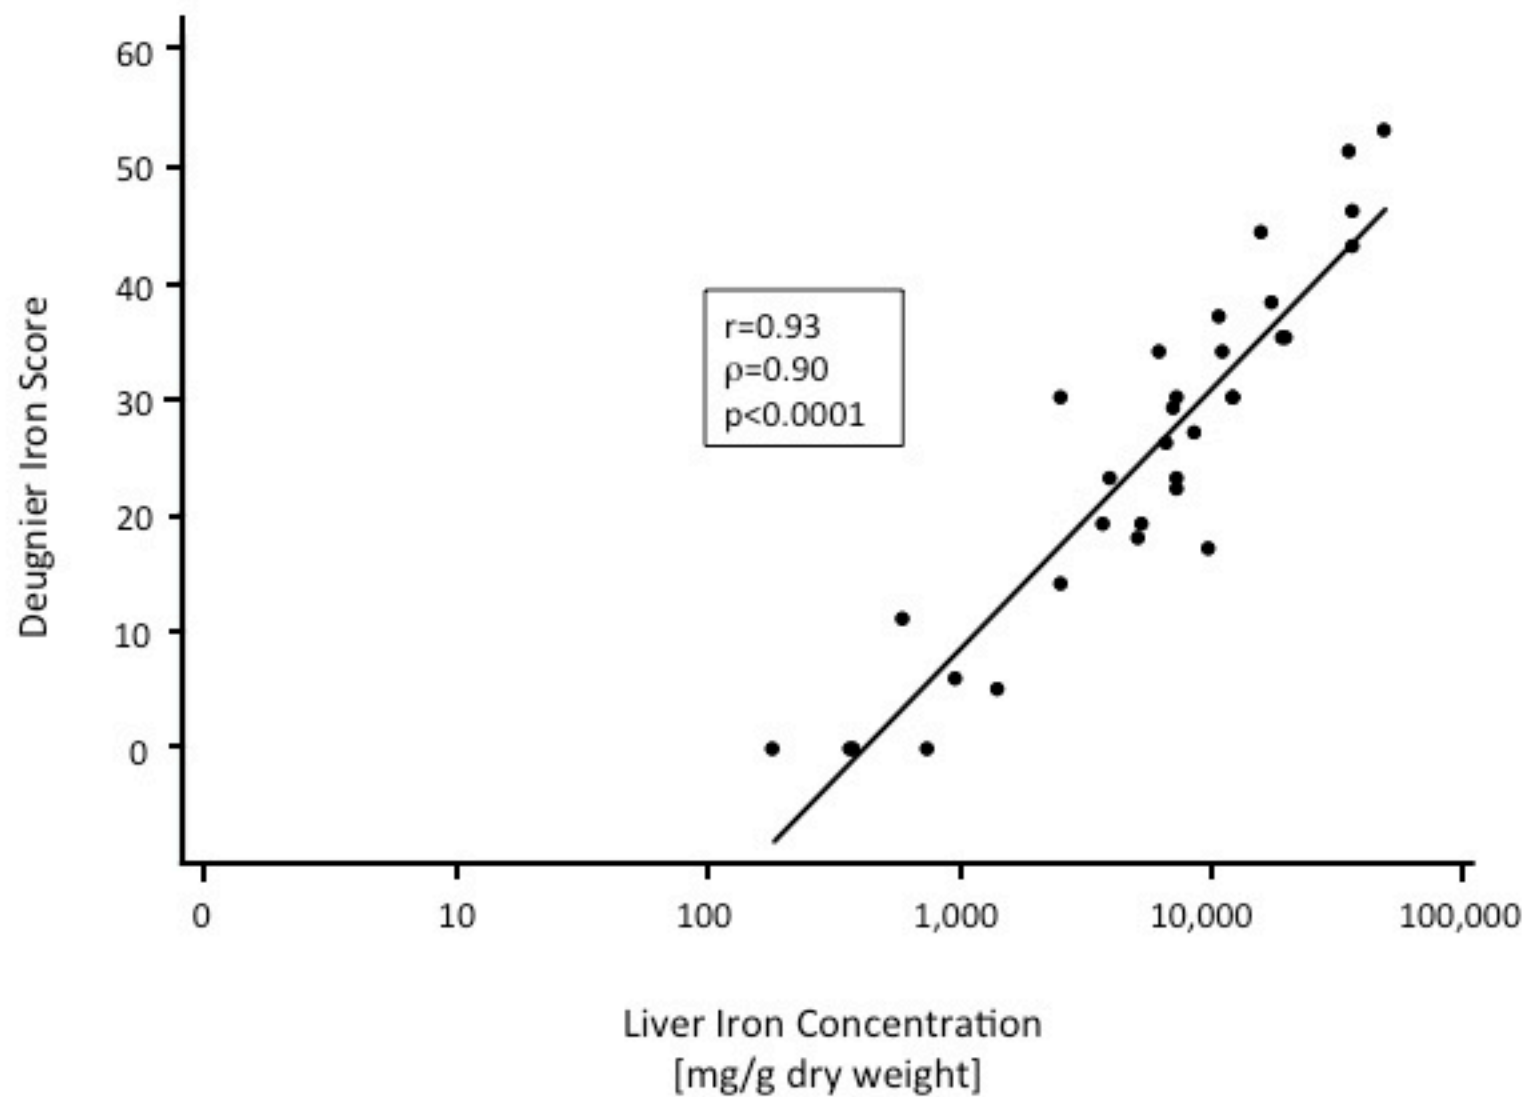

Figure 2a

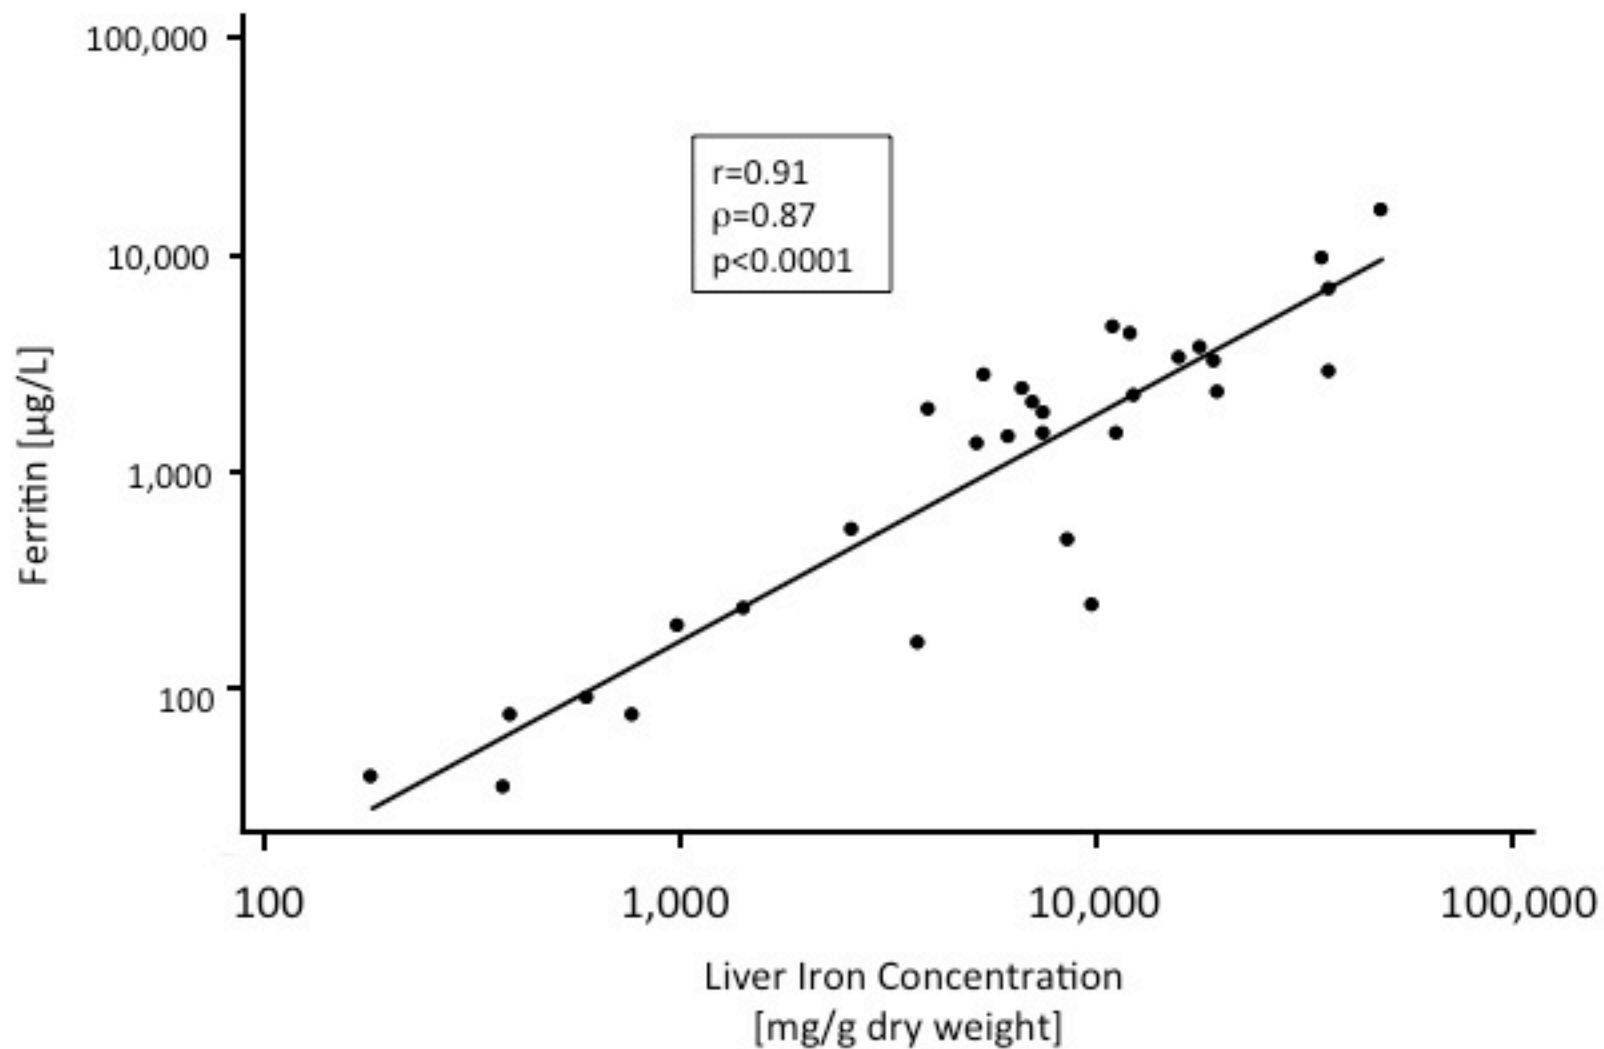

Figure 2b

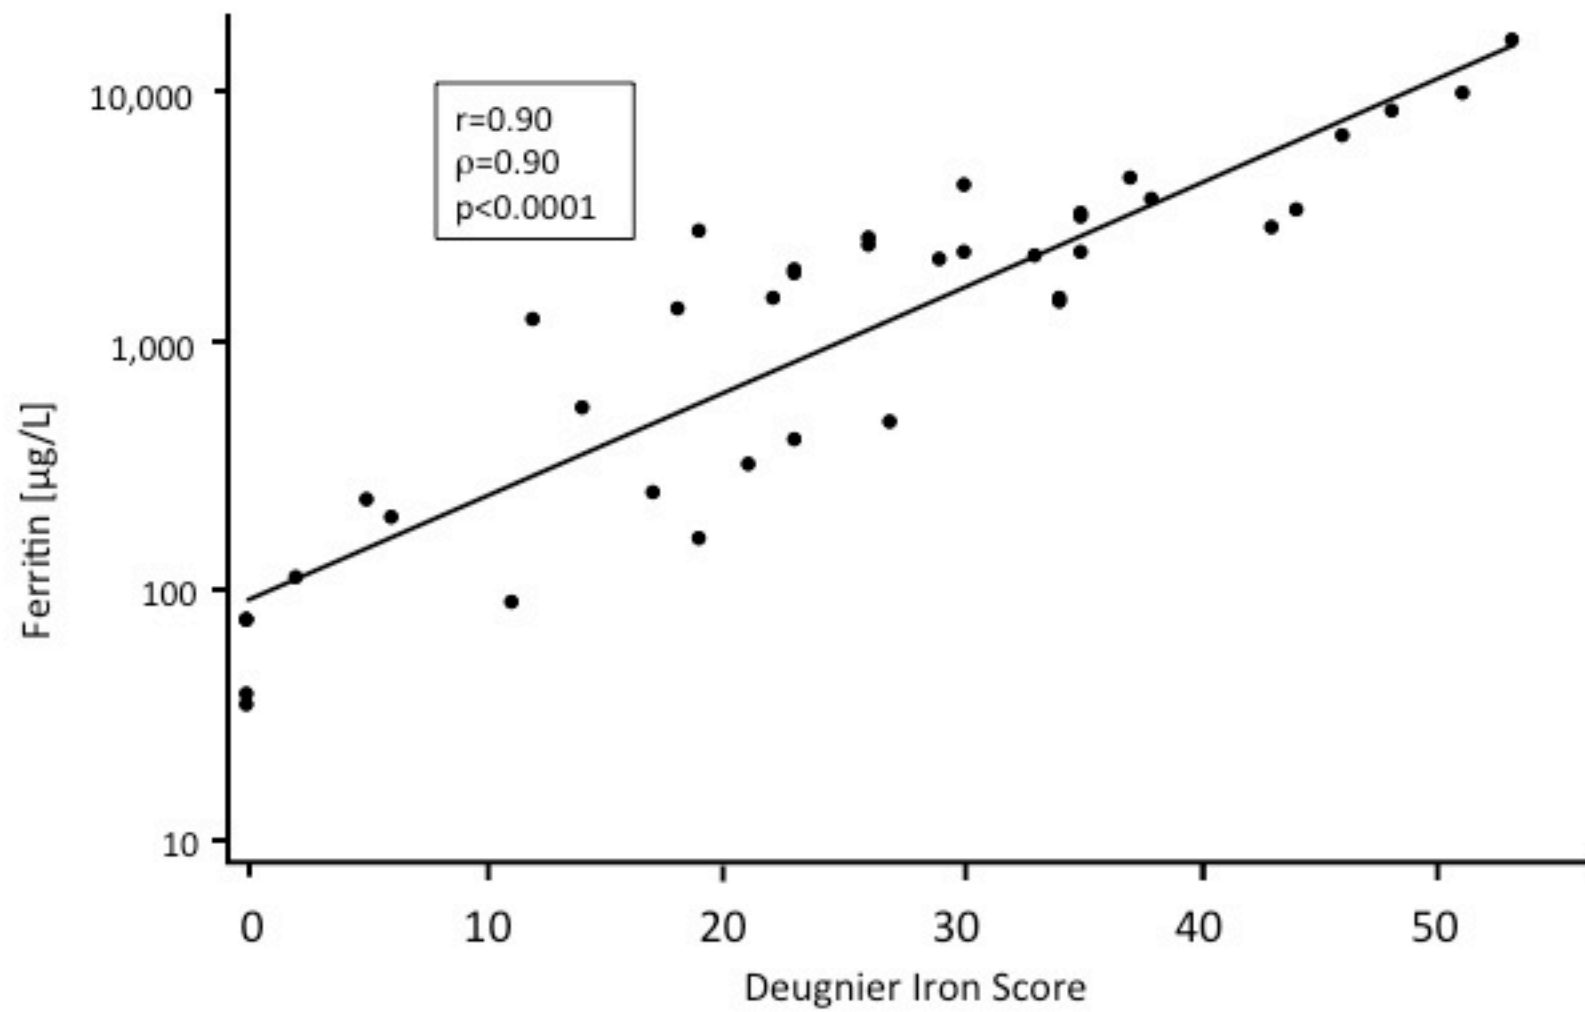

Figure 3a

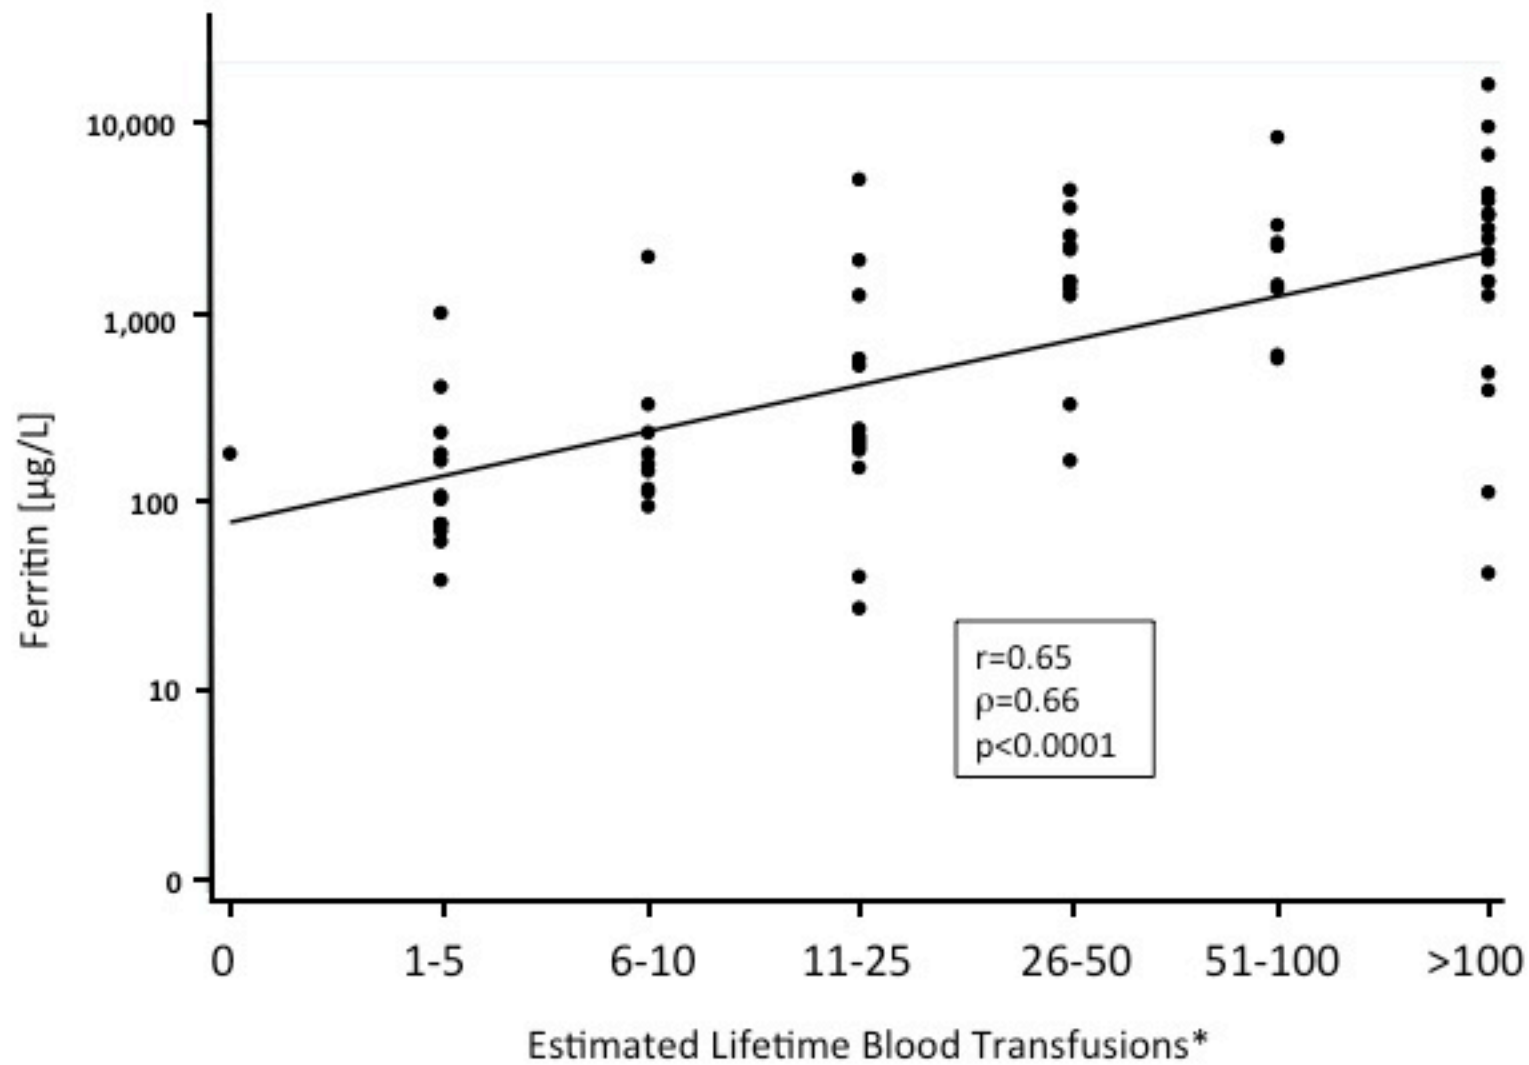

Supplementary Figure 3b

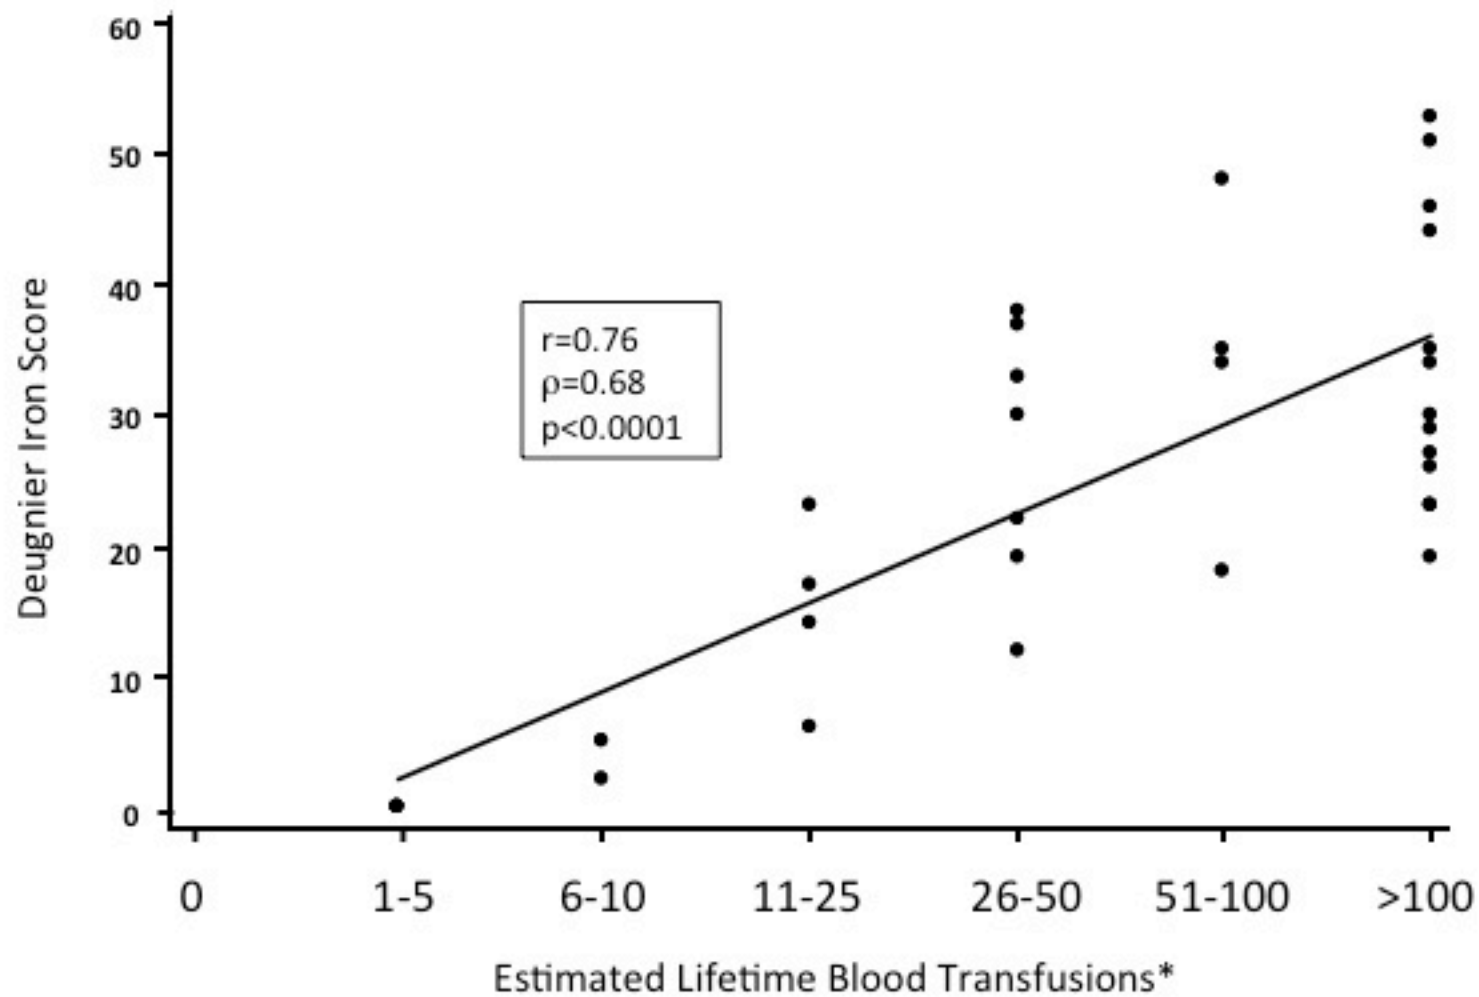

Figure 4

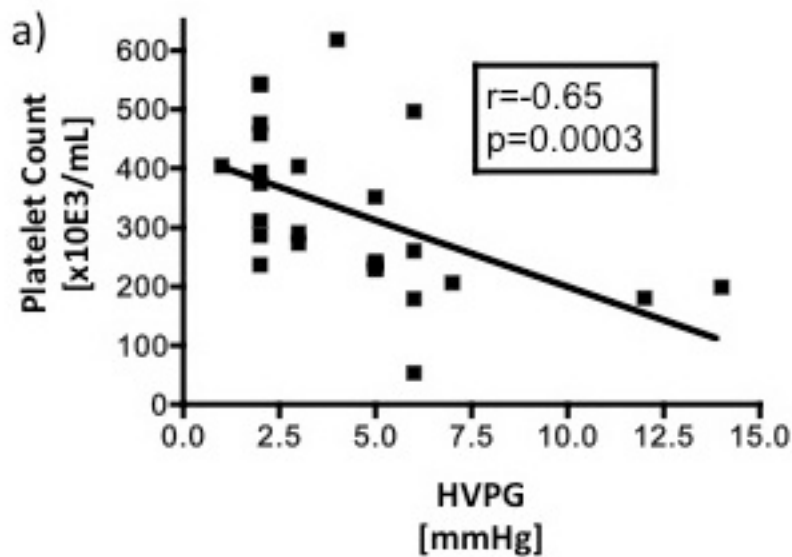

Supplementary Figure 5a and 5b

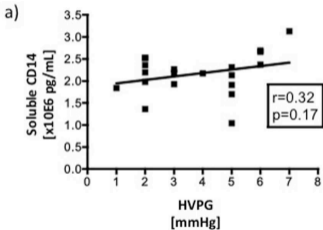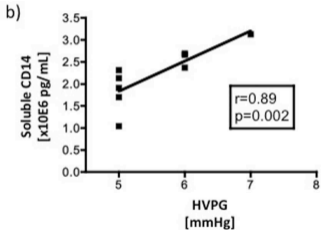

Supplement: NIHMS709875-supplement-Supp_FigureS1-S5.pdf [file NIHMS709875-supplement-Supp_FigureS1-S5.pdf]
